# Supplementary material for: Molecular Identification of Bacillus Isolated from Korean Water Deer (Hydropotes inermis argyropus) and Striped Field Mouse (Apodemus agrarius) Feces by Using an SNP-Based 16S Ribosomal Marker
Source: MDPI journal article supplement (doi:10.3390/ani12080979), 2022-04-10
Supplement: s1 [file s1]

## Supplementary Figure legends

**Figure S1 (A-H).** A. The colony of *Bacillus cereus*, BA\_1(MF139612), on *Bacillus cereus* Selective Agar (BCSA) was observed to be a distinctive turquoise to peacock blue color. B. Microscopic view showed a distinctive egg yolk-like precipitate, which has been marked using an arrow. C. The colonies of *Bacillus cereus*, BA#1 (MF139612), on Mannitol Egg Yolk Polymixin Agar (MYP) were of pink or pink-orange color, with white precipitation around the *Bacillus* colonies. D. Microscopic view of positive *Bacillus cereus* with whitish precipitation. E. Yellow colonies of *B. amyloliquefaciens*, BA#17 (MF139624), observed on MYP agar. F. Microscopic view of *B. amyloliquefaciens* group of bacteria. G. The white amorphous, large colonies of *Bacillus cereus* grown on Nutrient Agar plate (NA). H. Control media of MYP agar plate without inoculation of bacterial culture from fecal sample.

**Figure S2.** Single nucleotide polymorphism (SNP)-based primer was developed based on natural SNPs and modified nucleotide bases on the aligned 16S gene sequences of the *Bacillus cereus* group (*B. cereus*, *B. anthracis*, and *B. thuringiensis*). Natural SNPs were marked by red color with red square shape, target mutated bases marked by black square shape, and primer pairs were indicated by underline shaded. In this figure, *Bacillus cereus* strain B.1 (MF139612) was detected from a striped field mouse (*Apodemus agrarius*) fecal, and the other three species were downloaded from NCBI GenBank.

**Figure S3. (A-C).** PCR amplification of 16S primer (16S rRNA, Ba\_F/Ba\_R1) was used for amplification of 19 *Bacillus* species from wild animal fecal [upon using the first (Ba\_F/R) sequencing primer of forward primer, Ba\_F and second (Ba\_F1/R1) sequencing primer of reverse primer, Ba\_R1), see in the Table 1]. **B.** SNP-based primer (BcF1m and BCR1m) was developed by natural and artificial mutated bases at the 3' end of triplet bases of each primer **C.** Similarly, SNP-based (BcF2m/BCR2m) primer was developed for *Bacillus cereus* group specific identification. 'M' indicate DNA 100bp marker, The gel lane numbers are as follows: (accession no. of isolated *Bacillus* strains, 1-19) No.1 = MF139612; No.2 = MF139613 ; No.3 = MF139615 ; No.4 = MF139625 ; No.5 = MF139627 ; No.6 = MF139629; No.7 = MF139628 ; No.8 =chimeric sequence (No Accession No) ; No.9 = MF139626 ; No.10 = MF139620 ; No.11 = MF139619 ; No.12 = MF139621; No.13 = MF139622 ; No.14 = MF139616; No.15 = MF139617; No.16= MF139623; No.17 = MF139624; No.18 = MF139614; No.19 = MF139618;. and non-*Bacillus* sp. lane no I-V) No.I =*Salmonella enterica* (NCCP-15756); No.II = *Escherichia coli* (NCCP-14034); No.III= *Shigella dysenteriae* (NCCP-14746), No.IV = *Enterobacter cloacae* (10173), No.V =*Pseudomonas aeruginosa* (NCCP-16099) and No.VI = only PCR mixture without sample DNA as negative control.

## Supplementary Table legend

**Table S1.** List of fecal samples with the collection locality, animal species, and Global Positioning System (GPS) information

**Table S2.** Pairwise Kimura 2-Parameter (K2P) distances 18 interspecific relationships of three different *Bacillus* group.

**Table S3.** Polymorphic sites (SNPs, n=113) of 18 *Bacillus* 16S gene sequences of three different *Bacillus* group
