# Supplementary material for: Molecular Identification of Bacillus Isolated from Korean Water Deer (Hydropotes inermis argyropus) and Striped Field Mouse (Apodemus agrarius) Feces by Using an SNP-Based 16S Ribosomal Marker
Source: Animals (Basel). 2022 Apr 10;12(8):979. doi: 10.3390/ani12080979 (PMC9031142; doi:10.3390/ani12080979)
Supplement: Supplementary file 1 [file animals-12-00979-s001.zip]

Archive with 7 entries (7 files):
- Figure S1..pptx
- Figure S2..pptx
- Figure S3..pptx
- Supplementary data_legend.pdf
- Table S1.xlsx
- Table S2.xls
- Table S3.xls
