# Supplementary material for: Molecular Identification of Bacillus Isolated from Korean Water Deer (Hydropotes inermis argyropus) and Striped Field Mouse (Apodemus agrarius) Feces by Using an SNP-Based 16S Ribosomal Marker
Source: Animals (Basel). 2022 Apr 10;12(8):979. doi: 10.3390/ani12080979 (PMC9031142; doi:10.3390/ani12080979)
Supplement: Supplementary file 1 [file animals-12-00979-s001.zip › Table S1.xlsx]

## Sheet: Table_3
Table S1. List of fecal samples with the collection locality, animal species, and Global Positioning System (GPS) information
S. NO	Fecal sample (ID)	Species	Collection locality	Latitude	Longitude
1	ONApPe_M1	Apodemus agrarius	Mt. Odaesun	37° 47' 40.30"	128° 34' 56.22"
2	ONApPe_M2	A.agrarius	Mt. Odaesun	37° 47' 40.00"	128° 34' 57.61"
3	ONApPe_M3	A.agrarius	Mt. Odaesun	37° 47' 40.24"	128° 34' 56.21"
4	ONApPe_M4	A.agrarius	Mt. Odaesun	37° 47' 39.23"	128° 37' 00.60"
5	ONApPe_M5	A.agrarius	Mt. Odaesun	37° 47' 38.80"	128° 37' 35.54"
6	ONApPe_M6	A.agrarius	Mt. Odaesun	37° 47' 02.80"	128° 37' 35.54"
7	ONApPe_M7	A.agrarius	Mt. Odaesun	37° 47' 31.09"	128° 37' 23.70"
8	ONApPe_M8	A.agrarius	Mt. Odaesun	37° 47' 30.70"	128° 37' 20.11"
9	ONApPe_M9	A.agrarius	Mt. Odaesun	37° 47' 30.41"	128° 37' 22.73"
10	ONApPe_M10	A.agrarius	Mt. Odaesun	37°45' 59.23"	128° 36' 35.81"
11	ONApPe_M11	A.agrarius	Mt. Odaesun	37°45' 59.20"	128° 36' 35.52"
12	ONApPe_M12	A.agrarius	Mt. Odaesun	37°46' 02.79"	128° 36' 28.32"
13	ONApPe_M13	A.agrarius	Mt. Odaesun	37°45' 59.23"	128° 36' 35.81"
14	ONApPe_M14	A.agrarius	Mt. Odaesun	37°41' 50.71"	128° 34' 53.69"
15	ONApPe_M15	A.agrarius	Mt. Odaesun	37°29' 55.15"	128° 38' 04.82"
16	ONApPe_M16	A.agrarius	Mt. Odaesun	37°28' 43.21"	128° 41' 04.92"
17	ONApPe_M17	A.agrarius	Mt. Odaesun	37° 25' 24.53"	128° 26' 30.97"
18	ONApPe_M18	A.agrarius	Mt. Odaesun	37° 24' 12.21"	128° 20' 30.91"
19	ONApPe_M19	A.agrarius	Mt. Odaesun	37° 24' 51.94"	128° 31' 17.19"
20	ONApPe_M20	A.agrarius	Mt. Odaesun	37° 25' 28.16"	128° 31' 17.19"
21	ONApPe_M21	A.agrarius	Mt. Odaesun	37° 24' 50.08"	128° 19' 21.78"
22	ONApPe_M22	A.agrarius	Mt. Odaesun	37° 26' 38.11"	128° 20' 33.78"
23	ONApPe_M23	A.agrarius	Mt. Odaesun	37° 48' 10.83"	128° 37' 38.22"
24	ONApPe_M24	A.agrarius	Mt. Odaesun	37° 47' 46.31"	128° 36' 26.11"
25	ONApPe_M25	A.agrarius	Mt. Odaesun	37° 46' 43.80"	128° 37' 06.90"
26	ONApPe_M26	A.agrarius	Mt. Odaesun	37° 47' 22.80"	128° 36' 45.80"
27	ONApPe_M27	A.agrarius	Mt. Odaesun	37° 47' 45.30"	128° 38' 28.40"
28	ONApPe_M28	A.agrarius	Mt. Odaesun	37° 49' 12.20"	128° 38' 07.40"
29	ONApPe_M29	A.agrarius	Mt. Odaesun	37° 48' 28.30"	128° 36' 55.70"
30	ONApPe_M30	A.agrarius	Mt. Odaesun	37° 48' 49.70"	128° 36' 33.50"
31	ONApPe_M31	A.agrarius	Mt. Odaesun	37° 47' 40.27"	128° 34' 56.21"
32	ONApPe_M32	A.agrarius	Mt. Odaesun	37° 51' 11.04"	128° 40' 6.47"
33	ONApPe_M33	A.agrarius	Mt. Odaesun	37° 49' 23.00"	128° 37' 41.00"
34	ONApPe_M34	A.agrarius	Mt. Odaesun	37° 39' 12.44"	128° 52' 42.56"
35	ONApPe_M35	A.agrarius	Mt. Odaesun	37° 47' 32.00"	128° 31' 16.50"
36	ONApPe_M36	A.agrarius	Mt. Odaesun	37° 48' 15.70"	128° 35' 52.0"
37	ONApPe_M37	A.agrarius	Mt. Odaesun	37° 47' 55.60"	128° 20' 41.15"
38	ONApPe_M38	A.agrarius	Mt. Odaesun	37° 59' 55.63"	128° 56' 41.40"
39	ONApPe_M39	A.agrarius	Mt. Seroksan	38° 08' 52.72"	128° 29' 35.16"
40	ONApPe_M40	A.agrarius	Mt. Seroksan	38° 14' 48.30"	128° 33' 48.31"
41	ONApPe_M41	A.agrarius	Mt. Seroksan	38° 10' 36.30"	128° 33' 51.12"
42	ONApPe_M42	A.agrarius	Mt. Seroksan	38° 8' 53.00"	128° 29' 35.20"
43	ONApPe_M43	A.agrarius	Mt. Seroksan	38° 8' 52.70"	128° 29' 36.42"
44	ONApPe_M44	A.agrarius	Mt. Seroksan	38° 10' 47.93"	128° 27' 27.53"
45	ONApPe_M45	A.agrarius	Mt. Sobaek	36° 56' 48.31"	128° 26' 22.70"
46	ONApPe_M46	A.agrarius	Mt. Sobaek	36° 56' 44.02"	128° 26'18.90"
47	ONApPe_M47	A.agrarius	Mt. Sobaek	36° 56' 41.50"	128° 27' 09.41"
48	ONApPe_M48	A.agrarius	Mt. Sobaek	36° 56' 51.91"	128° 27' 29.61"
49	ONApPe_M49	A.agrarius	Mt. Sobaek	36° 56' 43.70"	128° 27' 22.41"
50	ONApPe_M50	A.agrarius	Mt. Sobaek	36° 56' 43.71"	128° 27' 22.40"
51	ONApPe_M51	A.agrarius	Mt. Sobaek	36° 56' 44.60"	128° 27' 42.40"
52	ONApPe_M52	A.agrarius	Mt. Sobaek	36° 56' 47.10"	128° 27' 43.50"
53	ONApPe_M53	A.agrarius	Mt. Sobaek	36° 56' 48.62"	128° 27' 44.50"
54	ONApPe_M54	A.agrarius	Mt. Sobaek	36° 56' 47.51"	128° 27' 45.10
55	ONApPe_M55	A.agrarius	Mt. Sobaek	36° 56' 46.61"	128° 27' 44.80"
1	SNHyIn_WD1	Hydropotes inermis	Mt. Odaesun	35° 26' 08.71"	128° 01' 14.3"
2	SNHyIn_WD2	H. inermis	Mt. Odaesun	35° 22' 24.90"	128° 13' 39.6"
3	SNHyIn_WD3	H. inermis	Mt. Odaesun	35° 34' 25.15"	128° 31' 37.6"
4	SNHyIn_WD4	H. inermis	Mt. Odaesun	37° 47' 55.61"	128° 38' 41.40"
5	SNHyIn_WD5	H. inermis	Mt. Odaesun	37° 46' 40.73"	128° 41' 35.19"
6	SNHyIn_WD6	H. inermis	Mt. Odaesun	37° 46' 29.86"	128° 36' 13.53"
7	SNHyIn_WD7	H. inermis	Mt. Odaesun	37° 47' 26.52"	128° 36' 49.36"
8	SNHyIn_WD8	H. inermis	Mt. Odaesun	37° 48' 34.90"	128° 37' 07.90"
9	SNHyIn_WD9	H. inermis	Mt. Odaesun	37° 48' 10.10"	128° 36' 18.29"
10	SNHyIn_WD10	H. inermis	Mt. Odaesun	37° 45' 24.31"	128° 37' 19.45"
11	SNHyIn_WD11	H. inermis	Mt. Odaesun	37° 49' 23.01"	128°37' 41.0"
12	SNHyIn_WD12	H. inermis	Mt. Seroksan	38° 08' 52.88"	128° 29' 35.2"
13	SNHyIn_WD13	H. inermis	Mt. Seroksan	38° 08' 52.82"	128° 29' 35.2"
14	SNHyIn_WD14	H. inermis	Mt. Seroksan	38° 09' 41.40"	128° 26' 47.5"
15	SNHyIn_WD15	H. inermis	Mt. Seroksan	38° 08' 53.11"	128° 29' 32.7"
16	SNHyIn_WD16	H. inermis	Mt. Seroksan	38° 09' 59.42"	128° 27' 06.4"
17	SNHyIn_WD17	H. inermis	Mt. Sobaek	36° 57' 06.32"	128° 26' 46.2"
18	SNHyIn_WD18	H. inermis	Mt. Sobaek	36° 56' 47.40"	128° 27' 10.6''
19	SNHyIn_WD19	H. inermis	Mt. Sobaek	36° 56' 25.01"	128° 26' 14.5"
20	SNHyIn_WD20	H. inermis	Mt. Sobaek	36° 56' 43.50"	128° 28' 11.9"
21	SNHyIn_WD21	H. inermis	Mt. Sobaek	36° 57' 12.60"	128° 26' 32.6"
22	SNHyIn_WD22	H. inermis	Mt. Sobaek	36° 57' 22.80"	128° 27' 11.3"
23	SNHyIn_WD23	H. inermis	Mt. Sobaek	36° 56' 52.70"	128° 27' 25.7"
24	SNHyIn_WD24	H. inermis	Mt. Sobaek	36° 57' 16.30"	128° 26' 20.7"
25	SNHyIn_WD25	H. inermis	Mt. Sobaek	36° 57' 03.03"	128° 27' 19.4"
