# Supplementary material for: Molecular Identification of Bacillus Isolated from Korean Water Deer (Hydropotes inermis argyropus) and Striped Field Mouse (Apodemus agrarius) Feces by Using an SNP-Based 16S Ribosomal Marker
Source: Animals (Basel). 2022 Apr 10;12(8):979. doi: 10.3390/ani12080979 (PMC9031142; doi:10.3390/ani12080979)
Supplement: Supplementary file 1 [file animals-12-00979-s001.zip › Table S2.xls]

## Sheet: Table-
	Table S2. Pairwise Kimura 2-Parameter (K2P) distances 18 interspecific relationships of three different Bacillus group
	Species	1	2	3	4	5	6	7	8	9	10	11	12	13	14	15	16	17	18
1	BA#03 (MF139615)
2	BA#14 (MF139616)	0.000793493
3	BA#2 (MF139613 )	0	0.000793493
4	BA#15 (MF139617 )	0	0.000793493	0
5	BA# 19 (MF139618)	0	0.000793493	0	0
6	BA#11 (MF139619)	0	0.000793493	0	0	0
7	BA#10 (MF139620 )	0	0.000793493	0	0	0	0
8	BA#12 (MF139621 )	0	0.000793493	0	0	0	0	0
9	BA#13 (MF139622 )	0	0.000793493	0	0	0	0	0	0
10	BA#16(MF139623)	0	0.000793493	0	0	0	0	0	0	0
11	BA#17 (MF139624 )	0	0.000793493	0	0	0	0	0	0	0	0
12	BA#18 (MF139614 )	0.000793651	0.00158777	0.000793651	0.000793651	0.000793651	0.000793651	0.000793651	0.000793651	0.000793651	0.000793651	0.000793651
13	BA#1(MF139612)	0.065907	0.0667631	0.065907	0.065907	0.065907	0.065907	0.065907	0.065907	0.065907	0.065907	0.065907	0.0650197
14	BA#7 (MF139628)	0.0700827	0.0709454	0.0700827	0.0700827	0.0700827	0.0700827	0.0700827	0.0700827	0.0700827	0.0700827	0.0700827	0.0691946	0.0545401
15	BA#09_WD_32(N)	0.0700827	0.0709454	0.0700827	0.0700827	0.0700827	0.0700827	0.0700827	0.0700827	0.0700827	0.0700827	0.0700827	0.0691946	0.0545401	0
16	BA#4 (MF139616)	0.0700827	0.0709454	0.0700827	0.0700827	0.0700827	0.0700827	0.0700827	0.0700827	0.0700827	0.0700827	0.0700827	0.0691946	0.0545401	0.00158856	0.00158856
17	BA#5 (MF139627)	0.0700827	0.0709454	0.0700827	0.0700827	0.0700827	0.0700827	0.0700827	0.0700827	0.0700827	0.0700827	0.0700827	0.0691946	0.0545401	0.00158856	0.00158856	0
18	BA#6 (MF139629)	0.0700827	0.0709454	0.0700827	0.0700827	0.0700827	0.0700827	0.0700827	0.0700827	0.0700827	0.0700827	0.0700827	0.0691946	0.0545401	0.00158856	0.00158856	0	0
	Pairwise K2P distances (=0) in the boxes indicate no sequence diffrence between correspending interspecific of 16s equences of Bacillus in the pairwise comparisons. The numbers in bold indicate the interspecific K2P distance.

## Sheet: Caption
Table. Estimates of Evolutionary Divergence between Sequences
The number of base substitutions per site from between sequences are shown. Analyses were conducted using the Kimura 2-parameter model [1]. The analysis involved 18 nucleotide sequences. Codon positions included were 1st+2nd+3rd+Noncoding. All positions containing gaps and missing data were eliminated. There were a total of 1261 positions in the final dataset. Evolutionary analyses were conducted…
1. Kimura M. (1980). A simple method for estimating evolutionary rate of base substitutions through comparative studies of nucleotide sequences. Journal of Molecular Evolution 16:111-120.
2. Kumar S., Stecher G., and Tamura K. (2016). MEGA7: Molecular Evolutionary Genetics Analysis version 7.0 for bigger datasets.Molecular Biology and Evolution 33:1870-1874.
Disclaimer: Although utmost care has been taken to ensure the correctness of the caption, the caption text is provided "as is" without any warranty of any kind. Authors advise the user to carefully check the caption prior to its use for any purpose and report any errors or problems to the authors immediately (www.megasoftware.net). In no event shall the authors and their employers be liable for a…
