# Supplementary material for: Molecular Identification of Bacillus Isolated from Korean Water Deer (Hydropotes inermis argyropus) and Striped Field Mouse (Apodemus agrarius) Feces by Using an SNP-Based 16S Ribosomal Marker
Source: Animals (Basel). 2022 Apr 10;12(8):979. doi: 10.3390/ani12080979 (PMC9031142; doi:10.3390/ani12080979)
Supplement: Supplementary file 1 [file animals-12-00979-s001.zip › Table S3.xls]

## Sheet: Sequence Data
Table S3. Polymorphic sites (SNPs, n=113) of 18 Bacillus 16S gene sequences of three different Bacillus group
Group	Species code (accession no.) a
																															1	1	1	1	1	1	1	1	1	1	3	3	3	3	3	3	3	3	3
		1	2	2	3	4	5	6	6	6	6	6	6	7	7	7	7	7	7	8	8	8	8	8	8	8	9	9	9	9	0	0	1	1	1	2	3	3	7	7	1	1	2	5	5	5	5	5	5
		1	0	1	8	9	0	4	5	6	7	8	9	0	2	3	4	6	7	3	4	5	6	7	8	9	0	2	7	8	1	9	0	7	8	4	1	2	0	8	0	7	5	0	2	3	4	5	6
B. amyloliquefaciens group	BA#03 (MF139615)	T	T	G	C	G	G	G	G	T	T	G	T	C	G	A	A	C	G	T	T	C	A	G	A	C	A	A	G	T	C	A	C	C	A	A	G	C	G	G	T	A	G	G	C	G	T	T	C
	BA#14 (MF139616)	.	.	.	.	.	.	.	.	.	.	.	.	.	.	.	.	.	.	.	.	.	.	.	.	.	.	.	.	.	.	.	.	.	.	.	.	.	.	.	.	.	.	.	.	.	.	.	.
	BA#02 (MF139613 )	.	.	.	.	.	.	.	.	.	.	.	.	.	.	.	.	.	.	.	.	.	.	.	.	.	.	.	.	.	.	.	.	.	.	.	.	.	.	.	.	.	.	.	.	.	.	.	.
	BA#15 (MF139617 )	.	.	.	.	.	.	.	.	.	.	.	.	.	.	.	.	.	.	.	.	.	.	.	.	.	.	.	.	.	.	.	.	.	.	.	.	.	.	.	.	.	.	.	.	.	.	.	.
	BA# 19 (MF139618)	.	.	.	.	.	.	.	.	.	.	.	.	.	.	.	.	.	.	.	.	.	.	.	.	.	.	.	.	.	.	.	.	.	.	.	.	.	.	.	.	.	.	.	.	.	.	.	.
	BA#11 (MF139619)	.	.	.	.	.	.	.	.	.	.	.	.	.	.	.	.	.	.	.	.	.	.	.	.	.	.	.	.	.	.	.	.	.	.	.	.	.	.	.	.	.	.	.	.	.	.	.	.
	BA#10 (MF139620 )	.	.	.	.	.	.	.	.	.	.	.	.	.	.	.	.	.	.	.	.	.	.	.	.	.	.	.	.	.	.	.	.	.	.	.	.	.	.	.	.	.	.	.	.	.	.	.	.
	BA#12 (MF139621 )	.	.	.	.	.	.	.	.	.	.	.	.	.	.	.	.	.	.	.	.	.	.	.	.	.	.	.	.	.	.	.	.	.	.	.	.	.	.	.	.	.	.	.	.	.	.	.	.
	BA#13 (MF139622 )	.	.	.	.	.	.	.	.	.	.	.	.	.	.	.	.	.	.	.	.	.	.	.	.	.	.	.	.	.	.	.	.	.	.	.	.	.	.	.	.	.	.	.	.	.	.	.	.
	BA#16(MF139623)	.	.	.	.	.	.	.	.	.	.	.	.	.	.	.	.	.	.	.	.	.	.	.	.	.	.	.	.	.	.	.	.	.	.	.	.	.	.	.	.	.	.	.	.	.	.	.	.
	BA#17 (MF139624 )	.	.	.	.	.	.	.	.	.	.	.	.	.	.	.	.	.	.	.	.	.	.	.	.	.	.	.	.	.	.	.	.	.	.	.	.	.	.	.	.	.	.	.	.	.	.	.	.
	BA#18 (MF139614 )	.	.	.	.	.	.	.	.	.	.	.	.	T	.	.	.	.	.	.	.	.	.	.	.	.	.	.	.	.	.	.	.	.	.	.	.	.	.	.	.	.	.	.	.	.	.	.	.
Bacillus cereus	BA#01(MF139612)	.	C	A	.	.	.	A	A	C	A	T	.	T	.	.	.	T	.	.	.	.	G	A	.	A	T	G	.	C	.	G	T	T	G	.	T	.	A	.	C	G	A	.	T	A	G	.	T
B. megaterium	BA#07 (MF139628)	C	.	.	T	A	A	A	.	G	A	T	C	T	C	T	C	T	T	G	A	G	.	T	G	A	T	G	A	.	T	.	T	.	.	G	.	T	A	A	C	G	A	A	A	A	G	A	G
	BA#09 (MF139625)	C	.	.	T	A	A	A	.	G	A	T	C	T	C	T	C	T	T	G	A	G	.	T	G	A	T	G	A	.	T	.	T	.	.	G	.	T	A	A	C	G	A	A	A	A	G	A	G
	BA#04 (MF139625)	C	.	.	T	A	A	A	.	G	A	T	C	T	C	T	C	T	T	G	A	G	.	T	G	A	T	G	A	.	T	.	T	.	.	G	.	T	A	A	C	G	A	A	G	A	G	A	G
	BA#05 (MF139627)	C	.	.	T	A	A	A	.	G	A	T	C	T	C	T	C	T	T	G	A	G	.	T	G	A	T	G	A	.	T	.	T	.	.	G	.	T	A	A	C	G	A	A	G	A	G	A	G
	BA#06 (MF139629)	C	.	.	T	A	A	A	.	G	A	T	C	T	C	T	C	T	T	G	A	G	.	T	G	A	T	G	A	.	T	.	T	.	.	G	.	T	A	A	C	G	A	A	G	A	G	A	G
a Polymorphic sites (position in parenthesis, i.e. polymorphic T>C starts at position 11 in the first column and polymorphic G>A ends at position 1225 in the last column) were presented on the alignment of 16S gene sequences in each column, the shaded color indicates the polymorphic bases (green color=A/G; light yellow color =C/T). "." indicates similar bases, "?" indicates the missing bases and …
[truncated: 65 more columns]

## Sheet: Info
Title	fasta file
Format
DataType	Nucleotide
18
Number Sites	113
Identical	.
Missing	?
Indel	-
